# Supplementary material for: Genome-wide function of MCM-BP in Trypanosoma brucei DNA replication and transcription
Source: PubMed Central journal article supplement — Nucleic Acids Res. 2018 Nov 8;47(2):634–47. doi: 10.1093/nar/gky1088 (PMC6344857; doi:10.1093/nar/gky1088), 2018-11-08
Supplement: gky1088_supplemental_files.pdf [file gky1088_supplemental_files.pdf]

## SUPPLEMENTARY DATA

### **Genome-wide function of MCM-BP in *Trypanosoma brucei* DNA replication and transcription**

Hee-Sook Kim <sup>1, 2, \*</sup>

<sup>1</sup> Laboratory of Lymphocyte Biology, Rockefeller University, 1275 York Avenue, New York, NY 10065, USA

<sup>2</sup> Department of Biological, Geological, and Environmental Sciences, Center for Gene Regulation in Health and Disease, Cleveland State University, 2121 Euclid Avenue, Cleveland, OH 44115, USA

\* To whom correspondence should be addressed.

Email: [h.kim77@csuohio.edu](mailto:h.kim77@csuohio.edu).

Tel: +1-216-523-7326

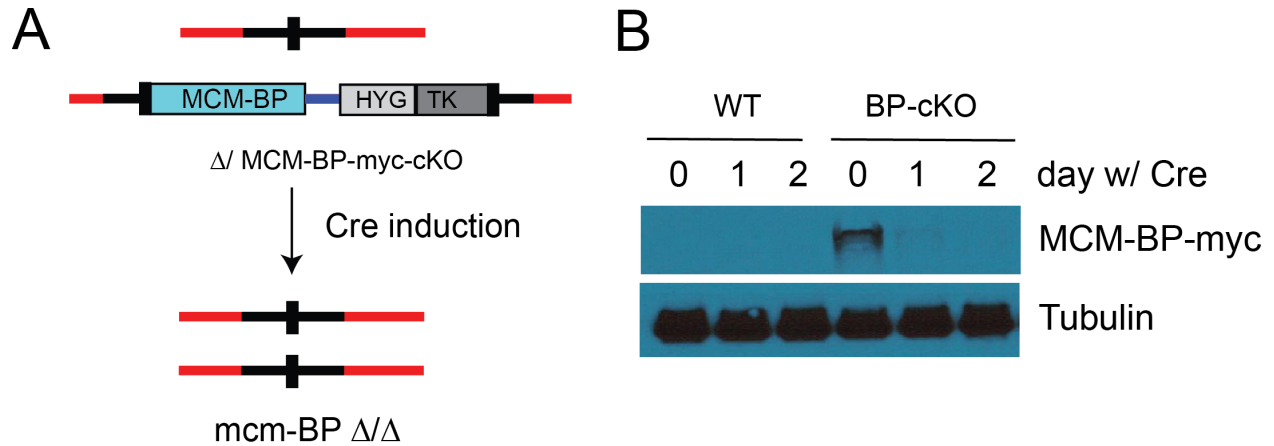

**Supplementary Figure S1. *Tb*MCM-BP conditional knock out (cKO) cell line** (A) Diagram of *Tb*MCM-BP removal strategy [11]. One allele of *Tb*MCM-BP was removed and the remaining allele was replaced with a loxP-*Tb*MCM-BP-myc-HYG-TK-loxP cassette. Tetracycline addition induces expression of Cre recombinase, which removes sequences between two loxP sites, resulting in a *Tb*MCM-BP knockout. (B) Depletion of *Tb*MCM-BP after tetracycline addition. Cells were collected at day 0, 1, and 2 after tetracycline addition and western blot was performed with mouse anti-myc antibody or mouse anti-tubulin antibody.

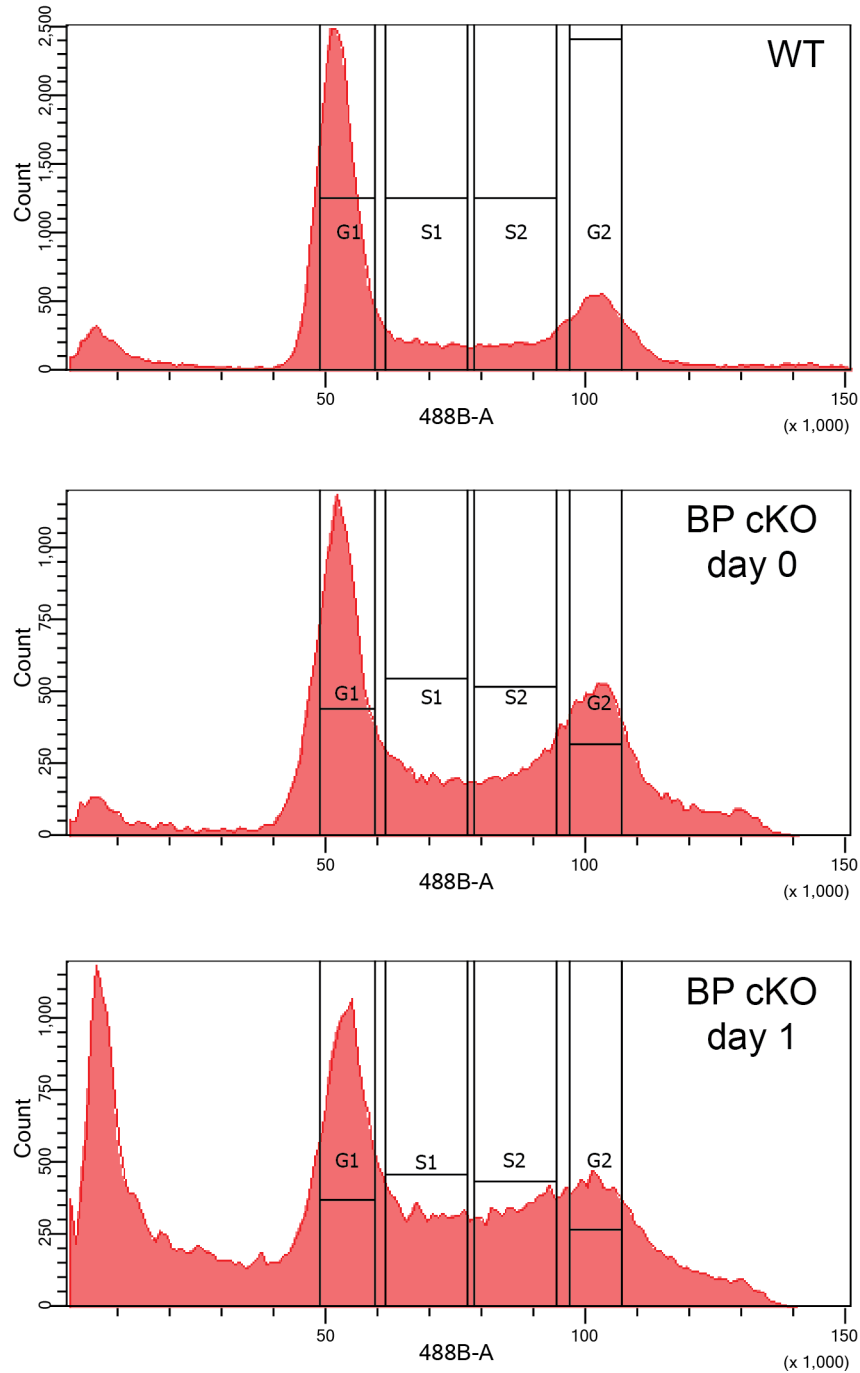

**Supplementary Figure S2. Cell sorting by flowcytometry (to perform MFA-seq experiments).** Cell population in G1, early S (S1), late S (S2) and G2 phases were sorted by flow cytometry (BD Aria3). Cell cycle profiles for WT, *TbMCM-BP* tet-untreated (day 0) and *TbMCM-BP* cKO tet-treated (day 1) are shown.

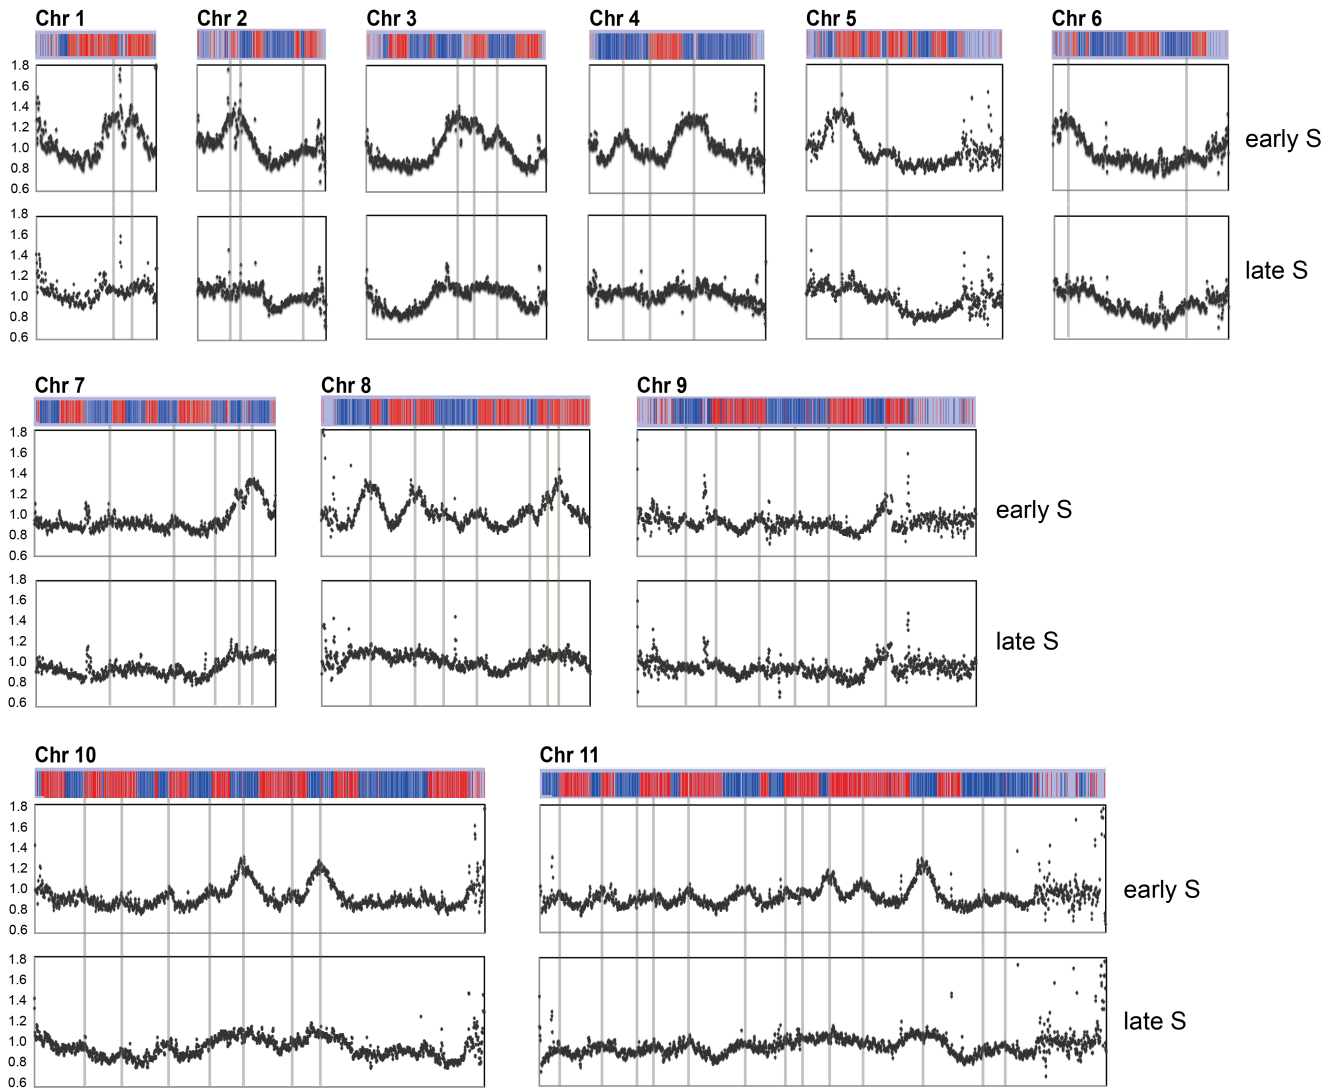

**Supplementary Figure S3. Comparison of replication profiles between early S and late S in wild type cells.** Replication was examined by the MFA-seq as in Figure 2. Sequence reads from S1 and S2 were compared to G1 phase DNA. Early S profiles are the same as those in Figure 2. Chromosomes were binned at 10 kb resolution with 2.5 kb step. Read count ratio of late S to G1 was plotted for 11 megabase chromosomes. Chromosomes are depicted as bars above each graph. Blue genes are transcribed reverse and red are forward direction. Grey lines indicate the early replicating origins that were identified by the McCulloch lab [7].

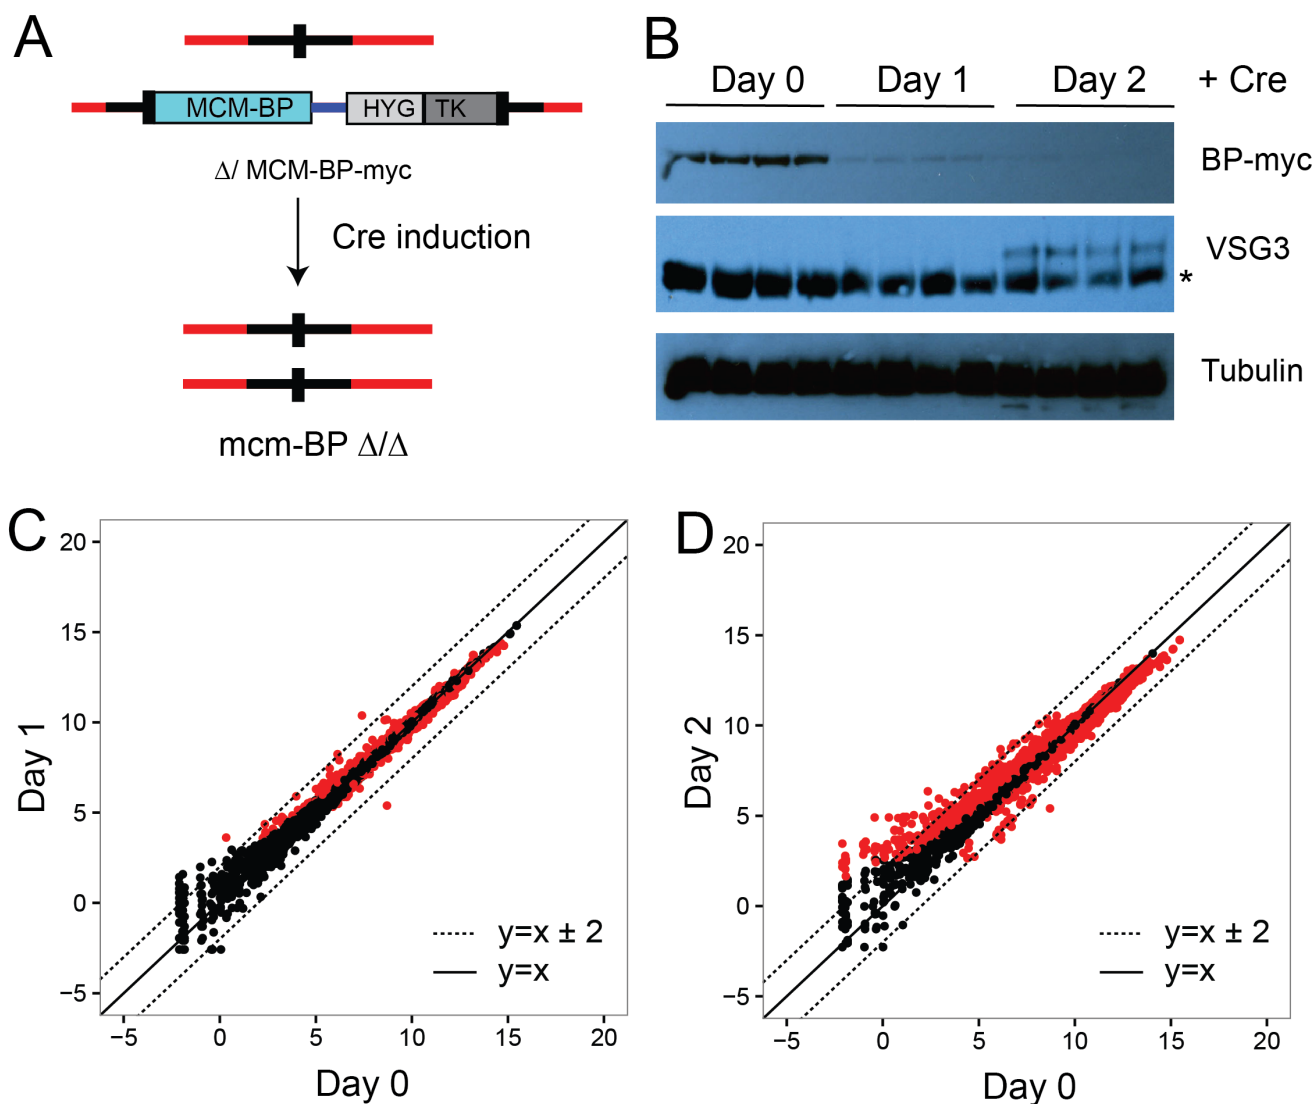

**Supplementary Figure S4. Gene expression in the absence of *Tb*MCM-BP by stranded RNA-seq.** (A) Diagram of *Tb*MCM-BP removal strategy [11]. (B) Western blot showing *Tb*MCM-BP depletion after tetracycline addition. Two independent cultures from two independent *Tb*MCM-BP cKO strains were analyzed (total 4 samples per day). Expression level of a silent VSG3 increases in the absence of *Tb*MCM-BP. (C & D) Gene expression profiles in the absence of *Tb*MCM-BP. Reads from the RNA-seq experiment were aligned to the Tb927v5 reference genome with Bowtie and analyzed with DESeq.  $\text{Log}_2$ (normalized count) values were obtained and graphed in scatter plots. Scatter plots show comparison between day 0 and day 1 (C) or between day 0 and day 2 (D) after *Tb*MCM-BP deletion. Red dots indicate genes whose expression level changed significantly (with  $P_{\text{adj}} < 0.01$ ). Dotted diagonal lines indicate changes that are 4-fold up or down.

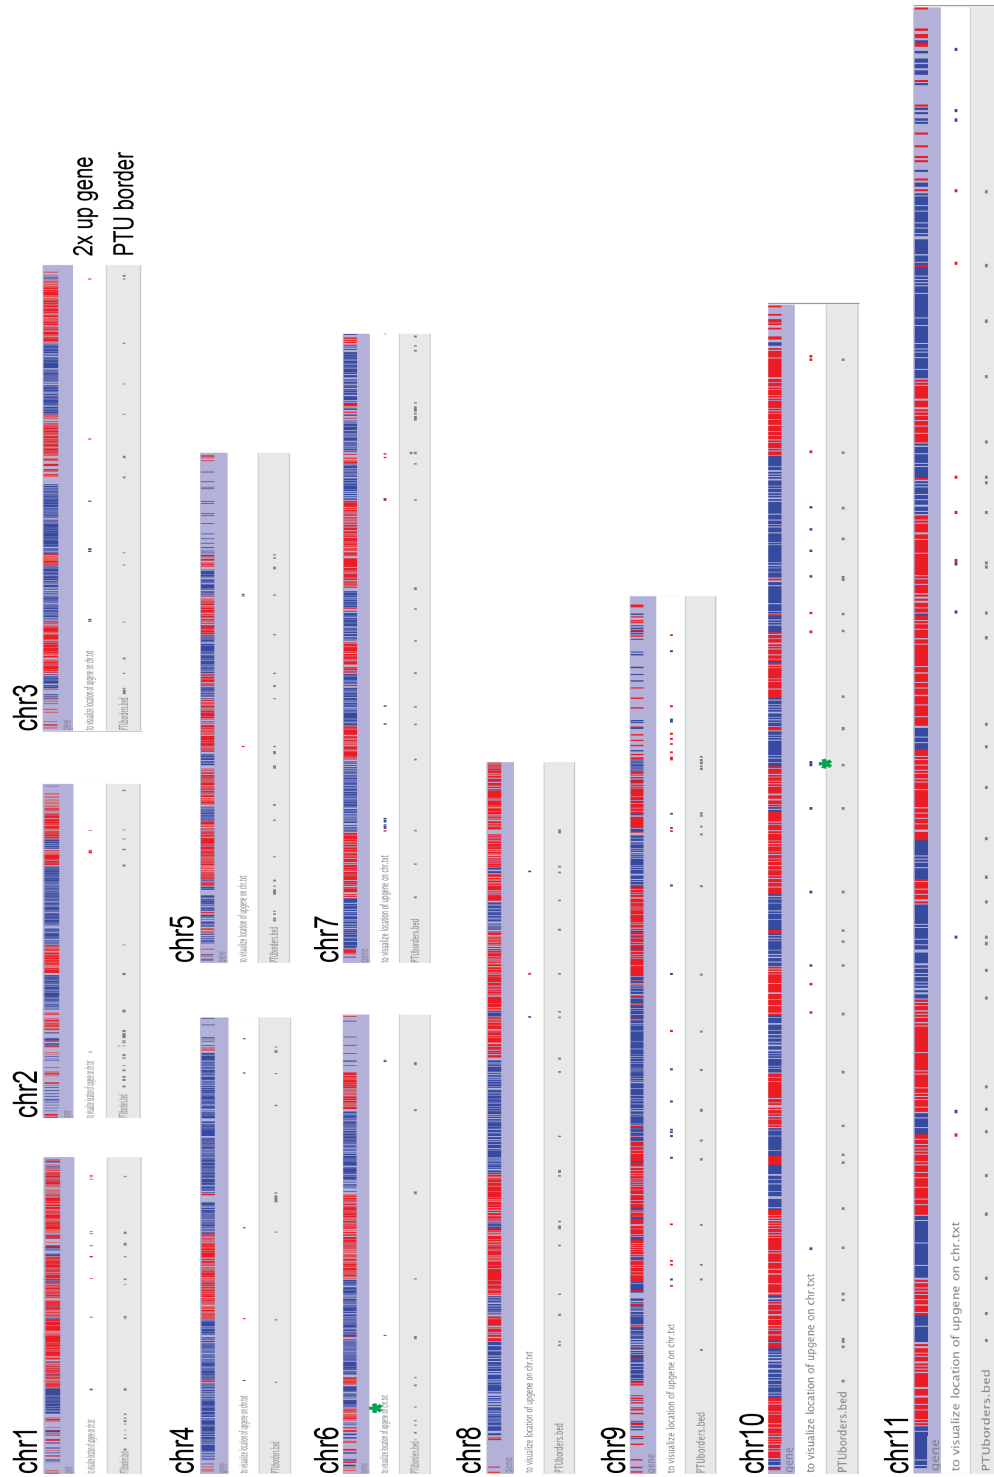

**Supplementary Figure S5. Genes that are at least > 2-fold up-regulated in the absence of *TbMCM-BP* are located close to borders of transcription.** Chromosome diagrams are shown on the top. Chromosomal locations of genes that are at least 2-fold upregulated in the absence of *TbMCM-BP* are shown as dots. Borders of PTUs (locations of TSSs, TTSs, & HTs) are also shown. Locations of procyclin genes on chromosome 6 and 10 are shown as green asterisks.

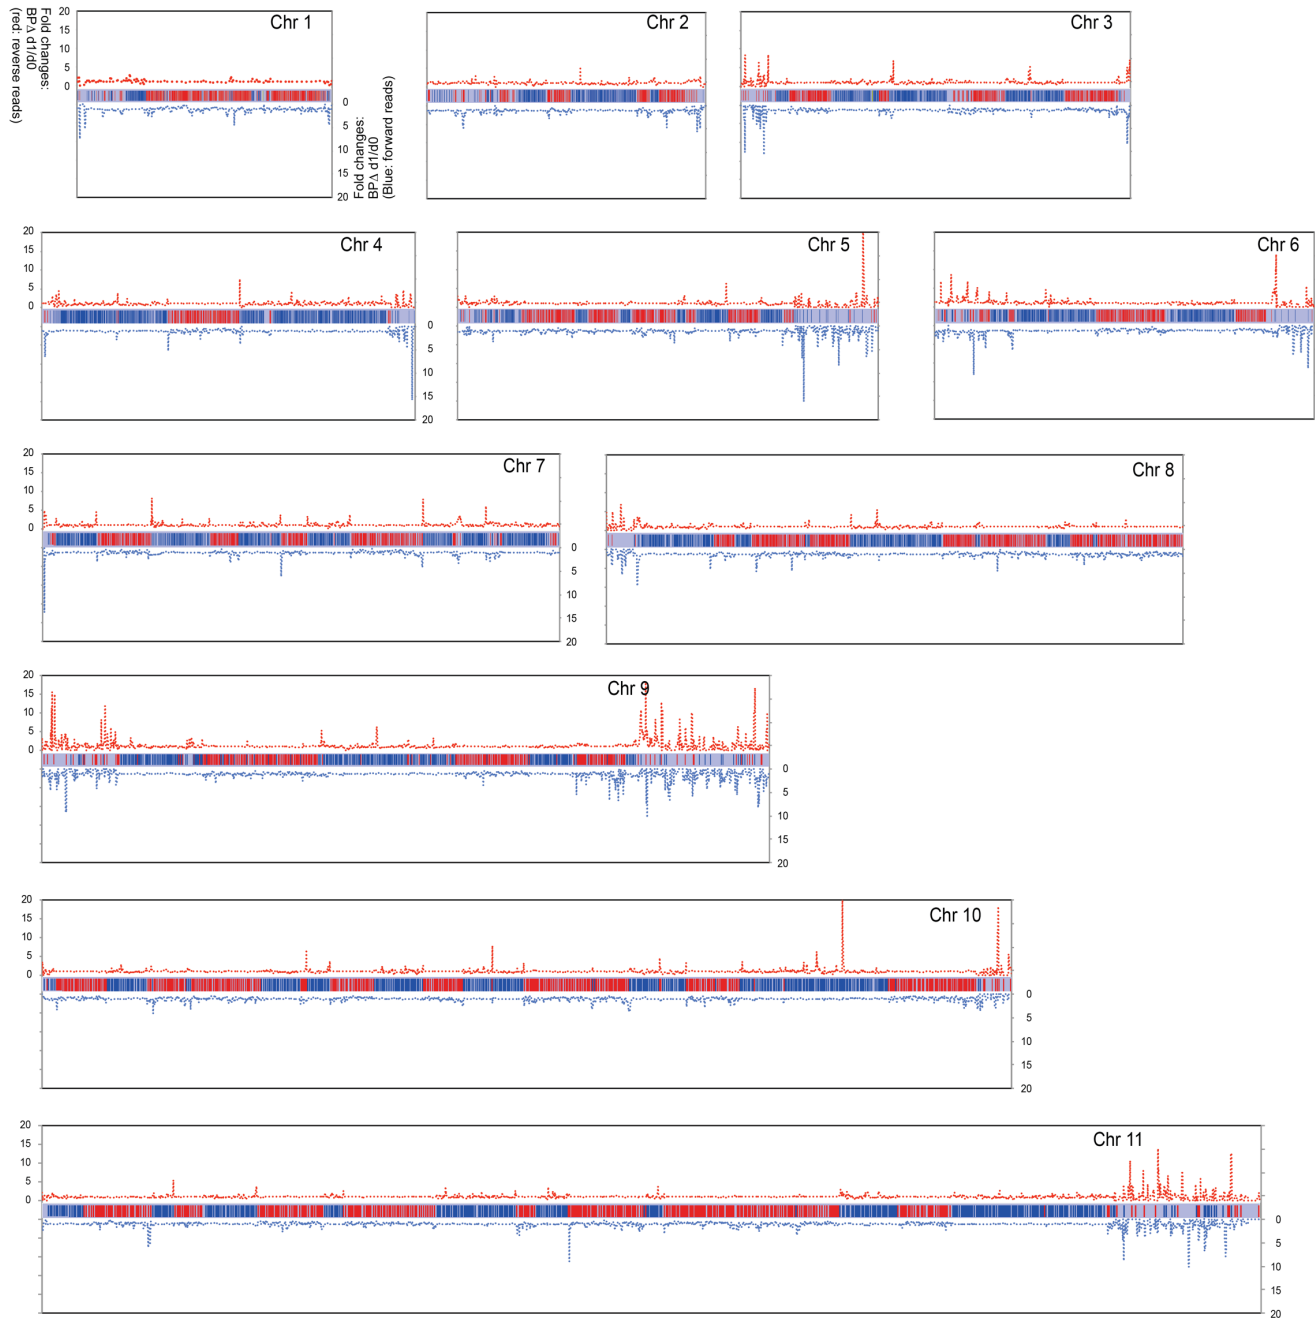

**Supplementary Figure S6. Fold changes of transcription levels between day 0 and day 1 upon *TbMCM-BP* removal.** The same analysis as in Figure 4 was performed to compare reads from day 0 and day 1 after *TbMCM-BP* deletion. Reverse and forward reads were analyzed separately. Red lines indicate fold changes from reverse reads (mapping to forward strand, red PTUs) and blue lines indicate fold changes from forward reads (mapping to reverse strands, blue PTUs). Chromosome diagrams are shown in the middle of each graph.

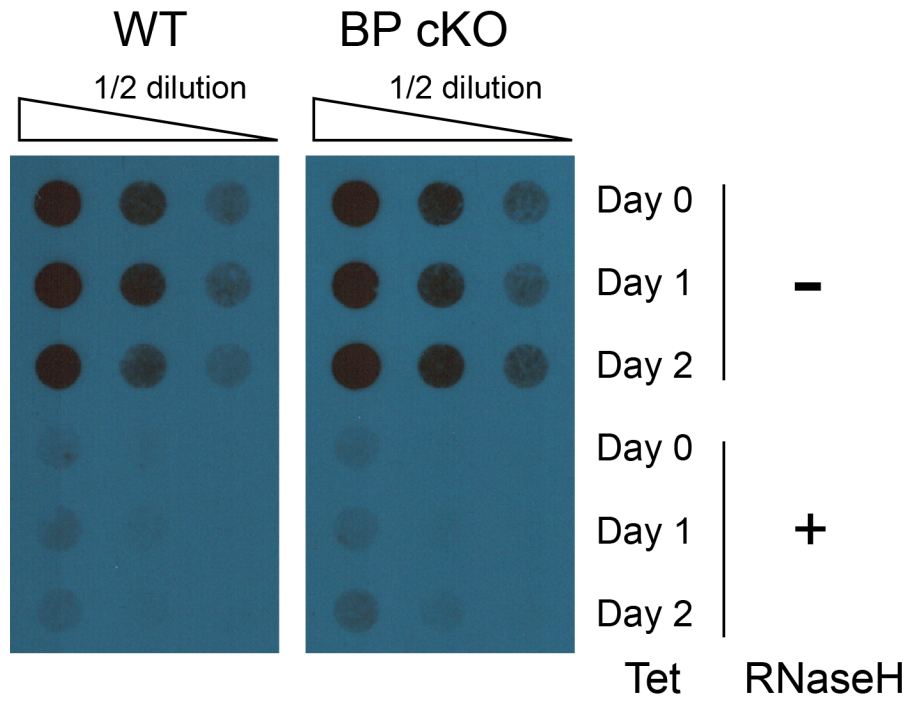

**Supplementary Figure S7. R loop analysis by dot blot.** Genomic DNA was isolated from WT and *TbMCM-BP* cKO treated with tetracycline for 0, 1, and 2 days. DNA was either treated or untreated with RNase H, 1:2 serially diluted and then spotted on a membrane. R loops were detected using the mouse S9.6 antibody [17].



**Supplementary Table S1.** DEseq analysis comparing gene expression levels between day 0 and day 2 after *TbMCM-BP* deletion. Genes that are at least 2-fold down or upregulated with *P*<sub>adj</sub> <0.01 are listed.

| <b>Genes that are &gt; 2-fold down regulated</b> |                                                         |                   |                   |             |            |
|--------------------------------------------------|---------------------------------------------------------|-------------------|-------------------|-------------|------------|
| ID                                               | Name                                                    | DEseq count day 0 | DEseq count day 2 | Fold change | padj value |
| Tb927.7.1770                                     | TbMCM-BP                                                | 414.29            | 42.31             | 0.10        | 7.58E-174  |
| Tb927.8.5120                                     | cytochrome C                                            | 1836.13           | 687.03            | 0.37        | 4.06E-60   |
| Tb927.10.3420                                    | NADH-ubiquinone oxidoreductase c                        | 22.10             | 9.26              | 0.42        | 2.66E-03   |
| Tb927.11.14090                                   | DRBD18, double RNA binding domain proein 18             | 4710.62           | 2020.80           | 0.43        | 5.06E-216  |
| Tb927.7.7510                                     | hypothetical protein                                    | 21997.36          | 9744.99           | 0.44        | 8.01E-97   |
| Tb927.10.4560                                    | translation elongation factor 2                         | 28195.76          | 12605.51          | 0.45        | 0.00E+00   |
| Tb927.10.4570                                    | hypothetical protein, conserved                         | 28159.49          | 12623.48          | 0.45        | 3.34E-314  |
| Tb927.9.10400                                    | hypothetical protein, conserved                         | 4459.11           | 2001.42           | 0.45        | 2.06E-200  |
| Tb927.10.10450                                   |                                                         | 430.87            | 197.54            | 0.46        | 3.48E-39   |
| Tb927.10.10540                                   | H2B                                                     | 879.60            | 407.34            | 0.46        | 1.51E-53   |
| Tb927.10.6060                                    | UMSBP2, universal minicircle sequence binding protein 2 | 1528.65           | 718.13            | 0.47        | 1.47E-56   |
| Tb927.10.10520                                   | H2B                                                     | 865.63            | 409.09            | 0.47        | 5.26E-48   |
| Tb927.4.2310                                     | asparaginyl tRNA synthase                               | 4402.78           | 2102.19           | 0.48        | 7.44E-87   |
| Tb927.11.2400                                    | Flabarin-like protein                                   | 657.67            | 314.30            | 0.48        | 1.18E-42   |
| Tb927.10.10560                                   | H2B                                                     | 857.21            | 410.30            | 0.48        | 2.12E-60   |
| Tb927.6.3180                                     | hypothetical protein, conserved                         | 2348.37           | 1125.86           | 0.48        | 1.56E-124  |
| Tb927.10.10480                                   | H2B                                                     | 865.52            | 415.32            | 0.48        | 4.95E-63   |
| Tb927.10.10550                                   | H2B                                                     | 867.51            | 420.72            | 0.48        | 6.73E-62   |
| Tb927.10.10590                                   | H2B                                                     | 1269.57           | 615.83            | 0.49        | 1.43E-57   |
| Tb927.10.10530                                   | H2B                                                     | 869.99            | 424.80            | 0.49        | 6.94E-61   |
| Tb927.10.10490                                   | H2B                                                     | 848.86            | 414.60            | 0.49        | 1.88E-59   |
| Tb927.10.10470                                   | H2B                                                     | 866.06            | 423.32            | 0.49        | 4.89E-58   |
| Tb927.10.10580                                   | H2B                                                     | 854.34            | 418.59            | 0.49        | 2.49E-59   |
| Tb927.10.10460                                   | H2B                                                     | 624.62            | 306.48            | 0.49        | 9.77E-38   |
| Tb927.10.540                                     | ATP-dependent RNA helicase SUB2                         | 986.23            | 485.58            | 0.49        | 4.64E-65   |

| Tb927.8.8330                        | calpain, cysteine peptidase                                 | 5336.99           | 2657.64           | 0.50        | 2.68E-124  |
|-------------------------------------|-------------------------------------------------------------|-------------------|-------------------|-------------|------------|
| Tb927.11.890                        | hypothetical conserved protein                              | 5795.16           | 2889.66           | 0.50        | 2.02E-171  |
| Tb927.4.4860                        | AATP8, amino acid transporter 8                             | 1518.73           | 761.52            | 0.50        | 2.14E-56   |
| Tb927.9.10310                       | MCP11, mitochondrial carrier protein 11                     | 2550.58           | 1280.23           | 0.50        | 6.63E-116  |
| Tb927.10.10500                      | H2B                                                         | 610.95            | 307.39            | 0.50        | 3.72E-43   |
| Tb927.10.3410                       | hypothetical protein                                        | 22.57             | 11.38             | 0.50        | 7.75E-03   |
| Tb927.10.3400                       | hypothetical protein, conserved                             | 182.06            | 92.29             | 0.51        | 2.49E-14   |
| Tb927.10.10510                      | H2B                                                         | 809.96            | 417.39            | 0.52        | 8.22E-51   |
| Tb927.10.11710                      | hypothetical protein                                        | 647.86            | 334.01            | 0.52        | 7.06E-42   |
| Tb927.11.4180                       | PSP-1 C-terminal conserved region                           | 1408.52           | 726.84            | 0.52        | 1.24E-26   |
| Genes that are > 2-fold upregulated |                                                             |                   |                   |             |            |
| ID                                  | Name                                                        | DEseq count day 0 | DEseq count day 2 | Fold change | padj value |
| Tb927.3.3700                        | hypothetical protein                                        | 65.05             | 125.82            | 1.93        | 7.11E-10   |
| Tb927.9.8920                        |                                                             | 12.83             | 24.83             | 1.94        | 1.56E-02   |
| Tb927.9.7430                        | VSG, related                                                | 45.36             | 88.27             | 1.95        | 1.40E-07   |
| Tb927.6.1300                        | hypothetical protein                                        | 10.25             | 20.02             | 1.95        | 1.68E-02   |
| Tb927.7.7550                        | protein of unknown function (DUF1181)                       | 45.26             | 89.20             | 1.97        | 1.04E-06   |
| Tb927.9.14570                       | LRRP, leucine-rich repeat protein                           | 562.00            | 1112.09           | 1.98        | 2.77E-32   |
| Tb927.3.2520                        | ESAG1                                                       | 23.99             | 47.91             | 2.00        | 1.44E-04   |
| Tb927.2.5310                        | hypothetical protein, conserved                             | 238.78            | 479.20            | 2.01        | 3.59E-36   |
| Tb927.5.2260                        | conserved protein                                           | 179.41            | 361.13            | 2.01        | 5.81E-20   |
| Tb927.9.3260                        | hypothetical protein                                        | 30.60             | 61.64             | 2.01        | 8.50E-06   |
| Tb927.5.4020                        | hypothetical protein                                        | 383.08            | 781.92            | 2.04        | 1.37E-25   |
| Tb927.11.4080                       | VSG, related                                                | 94.54             | 193.94            | 2.05        | 3.87E-12   |
| Tb927.10.12270                      | methyltransferase domain containing protein                 | 9.55              | 19.59             | 2.05        | 1.19E-02   |
| Tb927.10.16010                      | hypothetical protein                                        | 19.10             | 39.28             | 2.06        | 2.22E-04   |
| Tb927.2.5340                        | hypothetical protein, conserved                             | 121.83            | 250.63            | 2.06        | 2.19E-21   |
| Tb927.10.16100                      | FK506-binding protein (FKBP)-type peptidyl-prolyl isomerase | 354.59            | 731.56            | 2.06        | 1.95E-54   |

|                |                                          |        |         |      |           |
|----------------|------------------------------------------|--------|---------|------|-----------|
| Tb927.2.5360   | hypothetical protein, conserved          | 189.50 | 392.34  | 2.07 | 8.18E-32  |
| Tb927.9.9880   |                                          | 9.22   | 19.09   | 2.07 | 1.22E-02  |
| Tb927.3.590    | adenosine transporter                    | 143.00 | 297.99  | 2.08 | 2.19E-24  |
| Tb927.9.3190   |                                          | 15.88  | 33.32   | 2.10 | 6.10E-04  |
| Tb927.9.16000  |                                          | 29.80  | 62.82   | 2.11 | 1.12E-06  |
| Tb927.5.297b   | hypothetical protein                     | 73.95  | 156.80  | 2.12 | 8.81E-15  |
| Tb927.1.3590   |                                          | 17.25  | 37.07   | 2.15 | 2.14E-04  |
| Tb927.2.5350   | hypothetical protein, conserved          | 133.90 | 288.11  | 2.15 | 1.84E-26  |
| Tb927.6.460    | PAG3                                     | 14.26  | 30.72   | 2.15 | 3.27E-03  |
| Tb927.11.4410  |                                          | 40.81  | 87.99   | 2.16 | 2.46E-09  |
| Tb927.3.1510   | VSG, related                             | 272.15 | 588.94  | 2.16 | 5.66E-50  |
| Tb927.9.3810   |                                          | 11.39  | 24.95   | 2.19 | 4.46E-03  |
| Tb927.1.3760   | hypothetical protein, conserved          | 10.27  | 22.53   | 2.19 | 3.32E-03  |
| Tb927.8.5350   | hypothetical protein, conserved          | 48.05  | 105.61  | 2.20 | 5.02E-11  |
| Tb927.8.7300   | VSG, related                             | 140.72 | 311.10  | 2.21 | 1.36E-30  |
| Tb927.10.13690 | hypothetical protein, conserved          | 222.31 | 491.53  | 2.21 | 4.64E-45  |
| Tb927.3.5740   | hypothetical protein                     | 16.93  | 37.49   | 2.21 | 4.83E-03  |
| Tb927.5.296b   | hypothetical protein                     | 60.02  | 134.47  | 2.24 | 1.17E-14  |
| Tb927.10.13390 | hypothetical protein, conserved          | 228.85 | 513.93  | 2.25 | 1.76E-26  |
| Tb927.4.5090   | hypothetical protein                     | 13.47  | 30.38   | 2.26 | 3.66E-04  |
| Tb927.10.6890  | hypothetical protein                     | 100.15 | 229.01  | 2.29 | 1.19E-24  |
| Tb927.9.2960   |                                          | 68.01  | 155.60  | 2.29 | 5.45E-17  |
| Tb927.3.3160   | PAP1, polynucleotide adenylyltransferase | 512.51 | 1181.47 | 2.31 | 5.15E-100 |
| Tb927.1.4850   |                                          | 24.14  | 56.12   | 2.32 | 5.15E-07  |
| Tb927.8.7320   | VSG, related                             | 155.25 | 361.25  | 2.33 | 5.92E-38  |
| Tb927.1.4920   | hypothetical protein                     | 31.27  | 73.76   | 2.36 | 3.27E-09  |
| Tb927.9.2950   |                                          | 169.86 | 402.16  | 2.37 | 9.66E-44  |
| Tb927.3.1500   | VSG, related                             | 451.34 | 1072.56 | 2.38 | 5.94E-74  |
| Tb927.9.760    | hypothetical protein                     | 31.45  | 75.20   | 2.39 | 1.29E-09  |
| Tb927.9.7950   | hypothetical protein                     | 22.18  | 53.47   | 2.41 | 1.78E-07  |
| Tb927.1.940    |                                          | 9.00   | 21.80   | 2.42 | 1.86E-03  |
| Tb927.8.490    | hypothetical protein                     | 244.13 | 603.72  | 2.47 | 1.29E-32  |
| Tb927.11.17030 |                                          | 6.80   | 17.15   | 2.52 | 3.91E-03  |
| Tb927.7.2010   | RHS7                                     | 82.51  | 208.30  | 2.52 | 6.72E-19  |
| Tb927.7.7560   | hypothetical protein                     | 16.28  | 41.12   | 2.53 | 3.40E-03  |
| Tb927.7.2020   | RHS7                                     | 70.01  | 177.33  | 2.53 | 2.62E-23  |
| Tb927.9.7960   | hypothetical protein                     | 26.16  | 66.47   | 2.54 | 8.37E-10  |
| Tb927.1.50     |                                          | 5.50   | 14.03   | 2.55 | 1.12E-02  |

|                |                                    |        |         |      |           |
|----------------|------------------------------------|--------|---------|------|-----------|
| Tb927.10.1010  | hypothetical protein               | 4.95   | 12.72   | 2.57 | 2.04E-02  |
| Tb927.7.3250   | ESAG6                              | 418.83 | 1092.84 | 2.61 | 6.55E-58  |
| Tb927.4.3280   | ESAG2                              | 4.84   | 12.79   | 2.65 | 1.30E-02  |
| Tb927.7.6500   | VSG                                | 14.68  | 39.06   | 2.66 | 2.57E-06  |
| Tb927.5.170    | hypothetical protein,<br>conserved | 18.36  | 49.48   | 2.69 | 3.80E-08  |
| Tb927.1.2950   |                                    | 25.54  | 69.59   | 2.72 | 1.26E-09  |
| Tb927.2.5320   | hypothetical protein,<br>conserved | 74.40  | 207.12  | 2.78 | 9.41E-26  |
| Tb927.9.14620  |                                    | 5.12   | 14.28   | 2.79 | 5.50E-03  |
| Tb927.7.6010   | hypothetical protein               | 4.01   | 11.20   | 2.79 | 1.06E-02  |
| Tb927.11.12000 | hypothetical protein,<br>conserved | 27.50  | 77.27   | 2.81 | 1.35E-12  |
| Tb927.7.6030   | hypothetical protein               | 8.27   | 23.26   | 2.81 | 1.66E-03  |
| Tb927.11.12100 | RBP5, RNA binding<br>protein       | 531.11 | 1500.36 | 2.82 | 1.55E-169 |
| Tb927.7.3260   | ESAG7                              | 381.47 | 1083.59 | 2.84 | 4.25E-50  |
| Tb927.1.900    |                                    | 17.56  | 49.93   | 2.84 | 1.70E-08  |
| Tb927.8.520    | hypothetical protein               | 60.39  | 178.52  | 2.96 | 1.54E-29  |
| Tb927.9.7390   | VSG, related                       | 11.26  | 33.44   | 2.97 | 2.08E-06  |
| Tb927.9.770    | hypothetical protein,<br>conserved | 6.86   | 20.43   | 2.98 | 3.35E-04  |
| Tb927.10.3050  | hypothetical protein               | 7.37   | 21.98   | 2.98 | 4.68E-03  |
| Tb927.7.1970   | RHS7                               | 46.36  | 138.51  | 2.99 | 2.29E-23  |
| Tb927.7.2000   | RHS7                               | 71.60  | 215.89  | 3.02 | 1.42E-35  |
| Tb927.4.140    | hypothetical protein               | 7.26   | 22.11   | 3.05 | 5.19E-03  |
| Tb927.1.4930   |                                    | 36.13  | 110.43  | 3.06 | 1.40E-19  |
| Tb927.11.11990 | hypothetical protein               | 8.45   | 26.65   | 3.15 | 1.31E-05  |
| Tb927.6.480    | EP3-2                              | 37.55  | 119.29  | 3.18 | 1.39E-22  |
| Tb927.6.110    | hypothetical protein               | 5.27   | 17.04   | 3.23 | 4.00E-04  |
| Tb927.11.6730  | hypothetical protein               | 5.40   | 17.61   | 3.26 | 3.95E-04  |
| Tb927.7.1930   | nucleoside<br>diphosphatase        | 67.92  | 221.53  | 3.26 | 8.84E-25  |
| Tb927.7.1980   | RHS7                               | 49.29  | 160.84  | 3.26 | 3.11E-30  |
| Tb927.10.14850 |                                    | 11.01  | 36.77   | 3.34 | 7.17E-08  |
| Tb927.2.5720   | hypothetical protein               | 13.46  | 45.30   | 3.37 | 5.52E-10  |
| Tb927.11.11410 | trans-sialidase                    | 198.33 | 680.10  | 3.43 | 3.81E-119 |
| Tb927.10.10210 | PAG4                               | 53.27  | 184.11  | 3.46 | 1.35E-14  |
| Tb927.9.3200   |                                    | 7.31   | 25.34   | 3.46 | 4.38E-06  |
| Tb927.3.2590   | hypothetical protein               | 38.55  | 134.68  | 3.49 | 8.82E-25  |
| Tb927.9.7440   |                                    | 51.54  | 181.91  | 3.53 | 1.11E-37  |
| Tb927.6.510    | GPEET                              | 375.46 | 1334.72 | 3.55 | 1.79E-55  |
| Tb927.10.140   | hypothetical protein               | 6.30   | 22.44   | 3.56 | 9.33E-06  |
| Tb927.6.450    | EP3-2                              | 31.41  | 112.80  | 3.59 | 6.21E-24  |
| Tb927.11.16190 | hypothetical protein               | 5.68   | 20.44   | 3.60 | 3.09E-05  |

|                |                                       |        |         |      |           |
|----------------|---------------------------------------|--------|---------|------|-----------|
| Tb927.9.15970  |                                       | 2.17   | 7.82    | 3.60 | 1.57E-02  |
| Tb927.8.480    | phosphatidic acid phosphatase protein | 168.05 | 609.14  | 3.62 | 4.01E-46  |
| Tb927.8.500    | hypothetical protein                  | 41.85  | 152.46  | 3.64 | 6.55E-29  |
| Tb927.7.1950   | RHS7                                  | 37.41  | 137.34  | 3.67 | 3.95E-30  |
| Tb927.9.14940  | SLACS reverse transcriptase           | 64.30  | 236.22  | 3.67 | 4.25E-45  |
| Tb927.7.1940   | hypothetical protein                  | 3.34   | 12.39   | 3.71 | 1.45E-03  |
| Tb927.9.14610  |                                       | 10.12  | 38.01   | 3.76 | 2.29E-08  |
| Tb927.11.17830 | hypothetical protein, conserved       | 9.41   | 35.41   | 3.76 | 7.88E-09  |
| Tb927.5.3990   | VSG, atypical                         | 26.46  | 101.09  | 3.82 | 6.13E-06  |
| Tb927.10.10260 | EP1                                   | 280.96 | 1095.04 | 3.90 | 7.97E-57  |
| Tb927.1.3350   | hypothetical protein                  | 7.44   | 29.07   | 3.91 | 1.78E-07  |
| Tb927.8.510    | hypothetical protein                  | 39.08  | 153.23  | 3.92 | 8.82E-36  |
| Tb927.10.3060  |                                       | 8.82   | 35.11   | 3.98 | 4.39E-09  |
| Tb927.7.6540   | VSG, atypical                         | 12.08  | 48.13   | 3.98 | 4.03E-12  |
| Tb927.2.1290   | hypothetical protein                  | 3.12   | 12.63   | 4.05 | 6.67E-04  |
| Tb927.9.14650  | SLACS retrotransposabe element (part) | 124.84 | 511.72  | 4.10 | 2.31E-112 |
| Tb927.6.520    | EP3-3                                 | 102.15 | 431.09  | 4.22 | 7.36E-84  |
| Tb927.1.4960   |                                       | 3.54   | 15.02   | 4.24 | 1.90E-04  |
| Tb927.10.10240 | PAG1                                  | 52.70  | 227.46  | 4.32 | 5.98E-14  |
| Tb927.10.10230 | PAG5                                  | 74.30  | 320.78  | 4.32 | 1.57E-67  |
| Tb927.8.5930   | hypothetical protein                  | 4.89   | 21.96   | 4.49 | 1.27E-06  |
| Tb927.10.12580 | hypothetical protein                  | 2.76   | 12.40   | 4.50 | 1.26E-03  |
| Tb927.11.12710 | VSG, related                          | 31.99  | 144.01  | 4.50 | 2.78E-25  |
| Tb927.7.1960   | RHS7                                  | 40.34  | 182.75  | 4.53 | 8.75E-38  |
| Tb927.6.5260   | VSG                                   | 6.34   | 28.97   | 4.57 | 9.56E-09  |
| Tb927.10.13060 | hypothetical protein                  | 1.61   | 7.38    | 4.59 | 8.99E-03  |
| Tb927.9.4880   |                                       | 2.09   | 9.62    | 4.60 | 2.56E-03  |
| Tb927.3.2540   | VSG, related                          | 16.85  | 77.65   | 4.61 | 5.50E-21  |
| Tb927.10.10250 | PAG1                                  | 110.84 | 511.06  | 4.61 | 1.60E-126 |
| Tb927.10.7160  | PAG2                                  | 15.79  | 73.47   | 4.65 | 1.53E-20  |
| Tb927.9.8930   |                                       | 3.00   | 14.03   | 4.69 | 2.63E-04  |
| Tb927.1.3370   |                                       | 7.66   | 37.27   | 4.87 | 4.49E-11  |
| Tb927.9.3720   |                                       | 6.99   | 34.09   | 4.88 | 1.91E-10  |
| Tb927.9.16070  | hypothetical protein                  | 2.11   | 10.41   | 4.94 | 8.81E-04  |
| Tb927.9.3710   |                                       | 19.19  | 95.61   | 4.98 | 6.96E-28  |
| Tb927.9.17410  | VSG, atypical                         | 6.23   | 33.90   | 5.44 | 1.92E-11  |
| Tb927.6.5240   | VSG, atypical                         | 5.96   | 32.65   | 5.48 | 1.31E-07  |
| Tb927.1.3380   |                                       | 9.58   | 52.50   | 5.48 | 1.50E-16  |
| Tb927.10.12570 | hypothetical protein                  | 1.82   | 10.01   | 5.48 | 6.27E-04  |
| Tb927.1.2080   |                                       | 1.95   | 11.02   | 5.64 | 3.99E-04  |

|                |                                    |       |        |       |          |
|----------------|------------------------------------|-------|--------|-------|----------|
| Tb927.9.3210   |                                    | 4.67  | 26.75  | 5.73  | 2.63E-09 |
| Tb927.9.16490  | VSG                                | 2.59  | 15.03  | 5.80  | 1.15E-05 |
| Tb927.9.7340   | ESAG9                              | 13.46 | 79.14  | 5.88  | 2.77E-26 |
| Tb927.10.10220 | PAG2                               | 69.53 | 413.00 | 5.94  | 1.69E-70 |
| Tb927.9.16460  | VSG, atypical                      | 1.07  | 6.39   | 5.99  | 6.06E-03 |
| Tb927.9.11180  |                                    | 4.43  | 27.05  | 6.10  | 1.12E-09 |
| Tb927.11.11420 | hypothetical protein               | 2.24  | 13.97  | 6.24  | 2.38E-05 |
| Tb927.9.9930   |                                    | 1.75  | 11.12  | 6.35  | 1.70E-04 |
| Tb927.9.9910   |                                    | 0.78  | 5.35   | 6.89  | 9.81E-03 |
| Tb927.1.3770   |                                    | 1.25  | 8.77   | 7.03  | 8.16E-04 |
| Tb927.1.910    |                                    | 1.04  | 7.40   | 7.12  | 1.76E-03 |
| Tb927.9.16640  | VSG                                | 4.25  | 30.60  | 7.20  | 6.59E-12 |
| Tb927.7.3480   | hypothetical protein               | 1.78  | 12.93  | 7.27  | 1.65E-05 |
| Tb927.9.16200  | VSG                                | 1.55  | 12.46  | 8.04  | 1.19E-04 |
| Tb927.9.6810   |                                    | 0.75  | 6.08   | 8.06  | 4.92E-03 |
| Tb927.10.9550  | hypothetical protein               | 7.64  | 62.04  | 8.12  | 2.16E-25 |
| Tb927.3.2560   | hypothetical protein,<br>conserved | 2.84  | 23.50  | 8.26  | 5.33E-10 |
| Tb927.9.9890   |                                    | 1.53  | 12.86  | 8.39  | 8.72E-06 |
| Tb927.10.9530  | hypothetical protein               | 0.99  | 8.89   | 8.98  | 2.02E-04 |
| Tb927.9.11210  |                                    | 1.01  | 9.21   | 9.13  | 1.81E-04 |
| Tb927.10.14060 | hypothetical protein               | 1.17  | 10.66  | 9.14  | 6.70E-05 |
| Tb927.10.1760  | hypothetical protein               | 5.15  | 47.35  | 9.19  | 1.58E-20 |
| Tb927.11.17720 | VSG                                | 1.85  | 17.84  | 9.63  | 2.69E-08 |
| Tb927.4.2090   | hypothetical protein               | 3.08  | 32.97  | 10.72 | 1.73E-15 |
| Tb927.9.3220   |                                    | 0.75  | 8.27   | 11.10 | 2.51E-04 |
| Tb927.9.6820   |                                    | 0.75  | 8.31   | 11.15 | 1.91E-04 |
| Tb927.3.2570   | hypothetical protein,<br>conserved | 2.12  | 24.23  | 11.43 | 6.64E-12 |
| Tb927.11.13160 | hypothetical protein               | 0.82  | 9.65   | 11.74 | 2.40E-05 |
| Tb927.11.18430 | VSG                                | 1.53  | 18.38  | 12.01 | 2.50E-09 |
| Tb05.30F7.410  | hypothetical protein               | 0.76  | 9.80   | 12.89 | 2.33E-05 |
| Tb927.10.6430  | hypothetical protein               | 2.33  | 30.53  | 13.10 | 8.65E-16 |
| Tb927.9.3730   |                                    | 0.49  | 7.15   | 14.49 | 3.47E-04 |
| Tb927.10.8340  | hypothetical protein               | 2.09  | 30.78  | 14.71 | 3.33E-16 |
| Tb927.9.3250   |                                    | 0.56  | 8.80   | 15.75 | 2.74E-05 |
| Tb927.1.920    |                                    | 0.26  | 4.11   | 15.76 | 1.03E-02 |
| Tb927.3.2580   | hypothetical protein,<br>conserved | 5.07  | 81.85  | 16.14 | 4.61E-43 |
| Tb927.10.9540  |                                    | 0.51  | 8.29   | 16.18 | 3.74E-04 |
| Tb927.3.2550   | hypothetical protein,<br>conserved | 1.73  | 29.13  | 16.81 | 6.45E-16 |
| Tb927.4.5560   | VSG                                | 0.23  | 4.54   | 19.45 | 5.22E-03 |
| Tb927.9.16250  | VSG                                | 0.26  | 5.44   | 20.63 | 1.23E-03 |
| Tb927.9.3230   |                                    | 0.50  | 10.27  | 20.68 | 2.99E-06 |

|                |                      |      |       |       |          |
|----------------|----------------------|------|-------|-------|----------|
| Tb927.4.1210   | hypothetical protein | 0.26 | 5.48  | 20.77 | 1.58E-03 |
| Tb927.10.12560 | hypothetical protein | 0.49 | 10.38 | 21.03 | 2.85E-06 |
| Tb927.9.13160  | hypothetical protein | 0.26 | 5.65  | 21.42 | 1.12E-03 |
| Tb927.9.11190  |                      | 0.26 | 5.60  | 21.50 | 1.85E-02 |
| Tb927.1.930    |                      | 0.50 | 10.87 | 21.89 | 9.74E-06 |
| Tb927.9.11200  |                      | 0.54 | 11.90 | 22.04 | 2.09E-07 |
| Tb927.9.3240   |                      | 0.26 | 5.91  | 22.42 | 7.68E-04 |
| Tb927.7.6020   | hypothetical protein | 0.23 | 5.30  | 22.74 | 1.71E-03 |
| Tb927.10.7170  | hypothetical protein | 0.26 | 6.00  | 22.76 | 5.64E-04 |
| Tb927.3.370    | VSG                  | 0.26 | 6.21  | 23.84 | 3.91E-04 |
| Tb927.9.16320  | VSG                  | 1.25 | 30.07 | 23.98 | 7.26E-18 |
| Tb927.3.190    | VSG                  | 0.26 | 6.82  | 26.19 | 1.75E-04 |
| Tb927.2.5710   | hypothetical protein | 0.75 | 29.77 | 39.92 | 2.24E-19 |
| Tb927.9.17600  | VSG                  | 0.23 | 10.95 | 46.96 | 2.30E-07 |

**Supplementary Table S2.** *P* values generated from Kruskal–Wallis one-way analysis of variance test across samples of *Tb*MCM-BP cKO tetracycline treated for 0, 1, or 2 days and Mann-Whitney U test for transcript levels of TSSs, TTSs, or HT sites comparing between samples.

| <b>Statistical analysis for TSSs (for Figure 5)</b>     |             |                 |
|---------------------------------------------------------|-------------|-----------------|
| <b>Kruskal-Wallis One-Way Analysis of Variance Test</b> |             |                 |
| Kruskal-Wallis chi-squared                              | 20.084      |                 |
| <i>P</i> -value                                         | 4.354e-05   |                 |
| Mann-Whitney U Test                                     |             |                 |
|                                                         | W statistic | <i>P</i> -value |
| Day 1 to Day 0                                          | 4395        | 0.4748          |
| Day 2 to Day 0                                          | 5630        | 2.789e-05       |
| Day 2 to Day 1                                          | 5371        | 0.0005377       |
| <b>Statistical analysis for TTSs (for Figure 5)</b>     |             |                 |
| <b>Kruskal-Wallis One-Way Analysis of Variance Test</b> |             |                 |
| Kruskal-Wallis chi-squared                              | 7.4635      |                 |
| <i>P</i> -value                                         | 0.02395     |                 |
| Mann-Whitney U Test                                     |             |                 |
|                                                         | W statistic | <i>P</i> -value |
| Day 1 to Day 0                                          | 4269        | 0.3702          |
| Day 2 to Day 0                                          | 4867        | 0.008395        |
| Day 2 to Day 1                                          | 4596        | 0.0647          |
| <b>Statistical analysis for HTs (for Figure 5)</b>      |             |                 |
| <b>Kruskal-Wallis One-Way Analysis of Variance Test</b> |             |                 |
| Kruskal-Wallis chi-squared                              | 9.7693      |                 |
| <i>P</i> -value                                         | 0.007562    |                 |
| Mann-Whitney U Test                                     |             |                 |
|                                                         | W statistic | <i>P</i> -value |
| Day 1 to Day 0                                          | 2174        | 0.5498          |
| Day 2 to Day 0                                          | 2669        | 0.003106        |
| Day 2 to Day 1                                          | 2540        | 0.01917         |



**Supplementary Table S3.** *P* values generated from Kruskal–Wallis one-way analysis of variance test across samples of *Tb*MCM-BP cKO tetracycline treated for 0, 1, or 2 days and Mann-Whitney U test for transcript levels of all PTU borders or borders that are replicating early comparing between samples.

| <b>Statistical analysis for all PTU borders (for Figure 6)</b>           |             |                 |
|--------------------------------------------------------------------------|-------------|-----------------|
| <b>Kruskal-Wallis One-Way Analysis of Variance Test</b>                  |             |                 |
| Kruskal-Wallis chi-squared                                               | 32.683      |                 |
| <i>P</i> -value                                                          | 7.308e-08   |                 |
| <b>Mann-Whitney U Test</b>                                               |             |                 |
|                                                                          | W statistic | <i>P</i> -value |
| Day 1 to Day 0                                                           | 31193       | 0.2143          |
| Day 2 to Day 0                                                           | 37653       | 5.307e-08       |
| <b>Statistical analysis for early replicating origins (for Figure 6)</b> |             |                 |
| <b>Kruskal-Wallis One-Way Analysis of Variance Test</b>                  |             |                 |
| Kruskal-Wallis chi-squared                                               | 13.328      |                 |
| <i>P</i> -value                                                          | 0.0009937   |                 |
| <b>Mann-Whitney U Test</b>                                               |             |                 |
|                                                                          | W statistic | <i>P</i> -value |
| Day 1 to Day 0                                                           | 867         | 0.5234          |
| Day 2 to Day 0                                                           | 1157        | 0.0004787       |

**Supplementary Table S4.** Expression levels of genes involved in DNA replication are not significantly changed in the absence of *Tb*MCM-BP.

| Complex | Gene   | Gene ID        | DEseq day 0 | DEseq day 2 | Fold change | padj value |
|---------|--------|----------------|-------------|-------------|-------------|------------|
|         | MCM-BP | Tb927.7.1770   | 407.97      | 40.36       | 0.10        | 6.14E-177  |
| ORC     | ORC1   | Tb927.11.7216  | 179.65      | 175.32      | 0.98        | 7.44E-01   |
|         | ORC1B  | Tb927.9.2030   | 549.76      | 378.04      | 0.69        | 6.61E-14   |
|         | ORC4   | Tb927.10.13380 | 815.90      | 832.68      | 1.02        | 6.92E-01   |
|         | Tb3120 | Tb927.9.4530   | 1436.03     | 1531.23     | 1.07        | 8.86E-02   |
|         | Tb7980 | Tb927.10.7980  | 575.44      | 664.12      | 1.15        | 2.24E-03   |
| GINS    | SLD5   | Tb927.3.4810   | 204.72      | 338.06      | 1.65        | 8.11E-15   |
|         | PSF1   | Tb927.9.4990   | 252.62      | 302.81      | 1.20        | 4.62E-03   |
|         | PSF2   | Tb927.11.10460 | 411.74      | 434.31      | 1.05        | 4.10E-01   |
|         | PSF3   | Tb927.4.4680   | 138.72      | 179.01      | 1.29        | 2.99E-03   |
|         | CDC45  | Tb927.11.2710  | 505.16      | 369.51      | 0.73        | 1.17E-09   |
| MCM     | MCM2   | Tb927.11.7860  | 1061.98     | 1180.73     | 1.11        | 7.53E-03   |
|         | MCM3   | Tb927.2.3930   | 707.24      | 604.55      | 0.85        | 5.59E-04   |
|         | MCM4   | Tb927.11.12250 | 828.56      | 937.94      | 1.13        | 1.90E-03   |
|         | MCM5   | Tb927.11.5570  | 586.09      | 602.82      | 1.03        | 6.68E-01   |
|         | MCM6   | Tb927.11.11640 | 1096.95     | 1160.78     | 1.06        | 2.93E-01   |
|         | MCM7   | Tb927.11.16140 | 819.04      | 831.24      | 1.01        | 7.95E-01   |
|         | MCM8   | Tb927.10.10410 | 684.79      | 661.24      | 0.97        | 4.97E-01   |
|         | RPA1   | Tb927.11.9130  | 693.41      | 630.14      | 0.91        | 4.07E-02   |

**Supplementary Table S5.** DEseq analysis comparing VSG expression levels between day 0 and day 1 after *Tb*MCM-BP depletion. Increased VSGs (over 2-fold) with *P*adj values <0.01 and <0.1 are indicated by \*\* and \*.

| Type | ID       | DEseq count day 0 | DEseq count day 2 | Fold change | padj value |    |
|------|----------|-------------------|-------------------|-------------|------------|----|
| BES  | VSG-1    | 41.71             | 27.13             | 0.65        | 2.87E-02   |    |
| BES  | VSG-2    | 729332.60         | 507927.98         | 0.70        | 4.02E-04   |    |
| BES  | VSG-3    | 15.63             | 78.06             | 5.00        | 1.63E-17   | ** |
| BES  | VSG-4    | 1.11              | 1.92              | 1.72        | 7.05E-01   |    |
| BES  | VSG-5    | 1.22              | na                | na          | 1.42E-01   |    |
| BES  | VSG-6    | 28.87             | 385.59            | 13.36       | 3.52E-50   | ** |
| BES  | VSG-7    | 0.28              | 0.43              | 1.51        | 1.00E+00   |    |
| BES  | VSG-8    | 173.46            | 2435.38           | 14.04       | 1.86E-25   | ** |
| BES  | VSG-9    | 33.21             | 53.41             | 1.61        | 2.41E-02   |    |
| BES  | VSG-11   | 55.45             | 239.79            | 4.32        | 2.04E-26   | ** |
| BES  | VSG-12   | 0.60              | 1.00              | 1.67        | 8.26E-01   |    |
| BES  | VSG-13   | 12.89             | 75.64             | 5.87        | 9.58E-20   | ** |
| BES  | VSG-14   | 245.93            | 429.49            | 1.75        | 7.47E-07   |    |
| BES  | VSG-15   | 21.01             | 545.40            | 25.96       | 3.15E-57   | ** |
| BES  | VSG-16   | 5.29              | 17.95             | 3.40        | 3.16E-04   | ** |
| BES  | VSG-17   | 15.72             | 92.55             | 5.89        | 1.91E-22   | ** |
| BES  | VSG-18   | 24.29             | 132.52            | 5.46        | 3.61E-26   | ** |
| BES  | VSG-19   | 2.01              | 1.15              | 0.57        | 5.07E-01   |    |
| BES  | VSG-21   | 16.02             | 29.07             | 1.81        | 6.76E-03   |    |
| BES  | VSG-22   | 0.26              | na                | na          | 9.07E-01   |    |
| BES  | VSG-31   | na                | 27.13             | 0.65        | 1.00E+00   |    |
| MES  | VSG-397  | 59.48             | 254.70            | 4.28        | 8.12E-16   | ** |
| MES  | VSG-531  | 130.85            | 343.52            | 2.63        | 5.99E-14   | ** |
| MES  | VSG-582  | 5.84              | 78.25             | 13.40       | 6.85E-28   | ** |
| MES  | VSG-639  | 0.26              | 8.73              | 33.87       | 3.83E-06   | ** |
| MES  | VSG-653  | 73.28             | 204.50            | 2.79        | 1.18E-14   | ** |
| MES  | VSG-1954 | 53.35             | 615.22            | 11.53       | 2.33E-48   | ** |
| MC   | VSG-23   | 0.28              | 0.38              | 1.33        | 1.00E+00   |    |
| MC   | VSG-24   | 2.71              | 2.51              | 1.16        | 1.00E+00   |    |
| MC   | VSG-25   | na                | 1.38              | na          | 1.27E-01   |    |
| MC   | VSG-315  | 0.59              | 0.15              | 0.25        | 8.25E-01   |    |
| MC   | VSG-365  | 0.62              | 0.58              | 0.93        | 1.00E+00   |    |
| MC   | VSG-371  | na                | 0.76              | na          | 5.03E-01   |    |
| MC   | VSG-374  | na                | 0.49              | na          | 7.50E-01   |    |
| MC   | VSG-377  | 2.56              | 1.48              | 0.58        | 5.90E-01   |    |
| MC   | VSG-416  | 2.10              | 2.82              | 1.34        | 7.75E-01   |    |
| MC   | VSG-424  | 0.28              | na                | na          | 9.07E-01   |    |
| MC   | VSG-430  | 1.11              | 0.15              | 0.13        | 3.36E-01   |    |

|    |          |      |       |      |          |    |
|----|----------|------|-------|------|----------|----|
| MC | VSG-444  | 3.38 | 15.89 | 4.70 | 2.98E-05 | ** |
| MC | VSG-476  | 0.59 | 0.21  | 0.36 | 8.28E-01 |    |
| MC | VSG-503  | na   | 0.50  | na   | 7.46E-01 |    |
| MC | VSG-507  | 0.26 | 0.49  | 1.89 | 1.00E+00 |    |
| MC | VSG-514  | 4.68 | 42.72 | 9.13 | 3.54E-16 | ** |
| MC | VSG-542  | 0.26 | 1.29  | 5.02 | 3.29E-01 |    |
| MC | VSG-567  | 1.14 | 0.78  | 0.68 | 7.38E-01 |    |
| MC | VSG-575  | 0.28 | 0.30  | 1.04 | 1.00E+00 |    |
| MC | VSG-600  | 0.28 | na    | na   | 9.07E-01 |    |
| MC | VSG-618  | 0.62 | 0.36  | 0.58 | 1.00E+00 |    |
| MC | VSG-620  | 0.26 | 0.42  | 1.63 | 1.00E+00 |    |
| MC | VSG-622  | 0.31 | na    | na   | 9.07E-01 |    |
| MC | VSG-629  | 0.31 | 0.21  | 0.69 | 1.00E+00 |    |
| MC | VSG-634  | na   | 0.30  | na   | 8.14E-01 |    |
| MC | VSG-637  | 0.31 | 0.36  | 1.17 | 1.00E+00 |    |
| MC | VSG-643  | 0.88 | 0.55  | 0.62 | 7.95E-01 |    |
| MC | VSG-645  | 0.90 | 0.27  | 0.30 | 5.29E-01 |    |
| MC | VSG-646  | 0.91 | 0.15  | 0.16 | 5.31E-01 |    |
| MC | VSG-647  | 0.26 | na    | na   | 9.07E-01 |    |
| MC | VSG-649  | 0.62 | na    | na   | 4.90E-01 |    |
| MC | VSG-663  | 0.31 | 0.49  | 1.56 | 1.00E+00 |    |
| MC | VSG-666  | 1.16 | 0.64  | 0.55 | 7.35E-01 |    |
| MC | VSG-671  | 0.88 | na    | na   | 2.67E-01 |    |
| MC | VSG-672  | 0.62 | 0.86  | 1.40 | 1.00E+00 |    |
| MC | VSG-717  | 0.26 | 0.46  | 1.77 | 1.00E+00 |    |
| MC | VSG-1963 | 1.40 | 0.55  | 0.39 | 3.58E-01 |    |
| MC | VSG-2075 | 1.79 | 2.59  | 1.44 | 7.18E-01 |    |
| MC | VSG-2114 | 0.88 | 0.36  | 0.41 | 7.73E-01 |    |
| MC | VSG-2348 | 0.62 | 0.58  | 0.93 | 1.00E+00 |    |
| MC | VSG-3338 | 0.52 | 0.15  | 0.29 | 8.30E-01 |    |

**Supplementary Table S6.** DEseq analysis comparing VSG expression levels between day 0 and day 2 after *Tb*MCM-BP depletion. Increased VSGs (over 2-fold) with *P*adj values <0.01 and <0.1 are indicated by \*\* and \*. Decreased VSGs (over 2-fold) with *P*adj values <0.01 are indicated by ##.

| Type | ID       | DEseq count day 0 | DEseq count day 2 | Fold change | padj value |    |
|------|----------|-------------------|-------------------|-------------|------------|----|
| BES  | VSG-1    | 50.04             | 16.47             | 0.33        | 9.99E-08   | ## |
| BES  | VSG-2    | 873516.06         | 262904.38         | 0.30        | 5.13E-31   | ## |
| BES  | VSG-3    | 18.71             | 181.55            | 9.70        | 9.21E-40   | ** |
| BES  | VSG-4    | 1.33              | 3.37              | 2.54        | 2.96E-01   |    |
| BES  | VSG-5    | 1.48              | 3.42              | 2.31        | 2.82E-01   |    |
| BES  | VSG-6    | 34.63             | 346.09            | 10.00       | 3.67E-56   | ** |
| BES  | VSG-7    | 0.33              | 1.45              | 4.36        | 4.38E-01   |    |
| BES  | VSG-8    | 208.26            | 1609.04           | 7.73        | 5.31E-23   | ** |
| BES  | VSG-9    | 39.76             | 126.31            | 3.18        | 2.24E-13   | ** |
| BES  | VSG-11   | 66.68             | 447.58            | 6.71        | 7.16E-39   | ** |
| BES  | VSG-12   | 0.72              | 1.99              | 2.76        | 4.21E-01   |    |
| BES  | VSG-13   | 15.51             | 111.44            | 7.19        | 6.69E-26   | ** |
| BES  | VSG-14   | 295.30            | 655.88            | 2.22        | 1.17E-12   | ** |
| BES  | VSG-15   | 25.31             | 662.08            | 26.16       | 2.80E-43   | ** |
| BES  | VSG-16   | 6.39              | 60.19             | 9.42        | 1.27E-19   | ** |
| BES  | VSG-17   | 18.89             | 130.82            | 6.93        | 2.61E-27   | ** |
| BES  | VSG-18   | 29.17             | 193.20            | 6.62        | 4.50E-33   | ** |
| BES  | VSG-19   | 2.40              | 1.53              | 0.64        | 6.56E-01   |    |
| BES  | VSG-21   | 19.26             | 55.82             | 2.90        | 1.18E-07   | ** |
| BES  | VSG-22   | 0.30              | 0.15              | 0.48        | 1.00E+00   |    |
| BES  | VSG-31   | 1.00              | 0.44              | 0.44        | 7.74E-01   |    |
| MES  | VSG-397  | 71.25             | 638.78            | 8.97        | 1.88E-64   | ** |
| MES  | VSG-531  | 157.29            | 695.18            | 4.42        | 9.70E-35   | ** |
| MES  | VSG-582  | 6.94              | 71.29             | 10.27       | 4.19E-22   | ** |
| MES  | VSG-639  | 0.30              | 20.83             | 68.83       | 3.82E-12   | ** |
| MES  | VSG-653  | 87.82             | 440.02            | 5.01        | 2.21E-36   | ** |
| MES  | VSG-1954 | 64.20             | 973.12            | 15.16       | 2.85E-59   | ** |
| MC   | VSG-23   | 0.33              | 0.36              | 1.09        | 1.00E+00   |    |
| MC   | VSG-24   | 2.92              | 2.99              | 0.95        | 1.00E+00   |    |
| MC   | VSG-25   | 1.00              | 2.52              | 2.52        | 3.90E-02   | *  |
| MC   | VSG-315  | 0.71              | 0.61              | 0.86        | 1.00E+00   |    |
| MC   | VSG-365  | 0.76              | 1.65              | 2.17        | 5.83E-01   |    |
| MC   | VSG-371  | 1.00              | 2.21              | 2.21        | 5.58E-02   | *  |
| MC   | VSG-374  | 1.00              | 1.26              | 1.26        | 2.52E-01   |    |
| MC   | VSG-377  | 3.04              | 3.11              | 1.02        | 1.00E+00   |    |
| MC   | VSG-416  | 2.56              | 1.38              | 0.54        | 5.66E-01   |    |
| MC   | VSG-424  | 0.33              | 1.72              | 5.17        | 3.02E-01   |    |

|    |          |      |       |       |          |    |
|----|----------|------|-------|-------|----------|----|
| MC | VSG-430  | 1.31 | 0.83  | 0.63  | 7.88E-01 |    |
| MC | VSG-444  | 4.02 | 23.34 | 5.80  | 4.39E-07 | ** |
| MC | VSG-476  | 0.71 | 0.34  | 0.48  | 8.92E-01 |    |
| MC | VSG-503  | 1.00 | 2.16  | 2.16  | 5.77E-02 | *  |
| MC | VSG-507  | 0.30 | 0.70  | 2.33  | 9.57E-01 |    |
| MC | VSG-514  | 5.56 | 60.38 | 10.86 | 5.96E-20 | ** |
| MC | VSG-542  | 0.30 | 1.24  | 4.09  | 5.47E-01 |    |
| MC | VSG-567  | 1.38 | 1.46  | 1.06  | 1.00E+00 |    |
| MC | VSG-575  | 0.33 | 1.24  | 3.71  | 5.63E-01 |    |
| MC | VSG-600  | 0.33 | 0.58  | 1.75  | 1.00E+00 |    |
| MC | VSG-618  | 0.76 | 2.18  | 2.87  | 3.48E-01 |    |
| MC | VSG-620  | 0.30 | 1.43  | 4.73  | 4.46E-01 |    |
| MC | VSG-622  | 0.39 | 0.49  | 1.25  | 1.00E+00 |    |
| MC | VSG-629  | 0.37 | 1.00  | 2.69  | 8.06E-01 |    |
| MC | VSG-634  | 1.00 | 1.45  | 1.45  | 1.91E-01 |    |
| MC | VSG-637  | 0.37 | 1.31  | 3.53  | 4.55E-01 |    |
| MC | VSG-643  | 1.08 | 0.90  | 0.83  | 1.00E+00 |    |
| MC | VSG-645  | 1.08 | 1.07  | 0.99  | 1.00E+00 |    |
| MC | VSG-646  | 1.11 | 0.51  | 0.46  | 7.60E-01 |    |
| MC | VSG-647  | 0.30 | 1.04  | 3.45  | 6.66E-01 |    |
| MC | VSG-649  | 0.76 | 0.36  | 0.48  | 9.01E-01 |    |
| MC | VSG-663  | 0.39 | 0.56  | 1.44  | 1.00E+00 |    |
| MC | VSG-666  | 1.38 | 0.70  | 0.51  | 6.56E-01 |    |
| MC | VSG-671  | 1.05 | 1.07  | 1.01  | 1.00E+00 |    |
| MC | VSG-672  | 0.74 | 3.76  | 5.05  | 6.37E-02 | *  |
| MC | VSG-717  | 0.30 | 0.68  | 2.25  | 9.62E-01 |    |
| MC | VSG-1963 | 1.66 | 3.04  | 1.83  | 5.01E-01 |    |
| MC | VSG-2075 | 2.16 | 4.56  | 2.11  | 2.37E-01 |    |
| MC | VSG-2114 | 1.05 | 0.58  | 0.56  | 7.60E-01 |    |
| MC | VSG-2348 | 0.76 | 2.60  | 3.42  | 2.09E-01 |    |
| MC | VSG-3338 | 0.61 | 0.34  | 0.56  | 8.79E-01 |    |
